# Supplementary material for: The impossibility of low-rank representations for triangle-rich complex networks
Source: PubMed Central journal article supplement (PMC7084093; doi:10.1073/pnas.1911030117), 2020-03-02
Supplement: pnas.1911030117.sapp.pdf [file pnas.1911030117.sapp.pdf]

Degree vs  $\Delta$  of facebook and embeddings

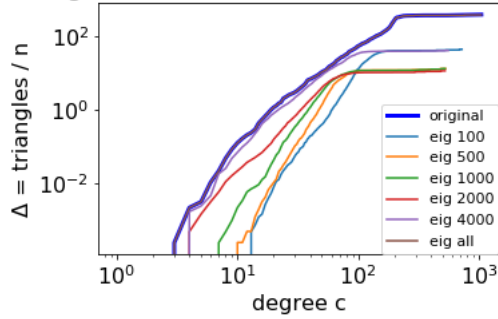

Fig. 1. Plots of degree  $c$  vs  $\Delta$ , for varying rank: For the Facebook social network, for varying rank of embedding, we plot  $c$  versus the total number of triangles only involving vertices of degree at most  $c$ . The embedding is generated by taking the top eigenvectors. Observe how even a rank of 2000 does not suffice to match the true triangle values for low degree.

1 **Supporting Information (SI) for “The impossibility of**  
 2 **low rank representations for triangle-rich complex**  
 3 **networks”**

4 **1. Further empirical details**

5 *Optimization for LRDP and LRHP:* The fitting of the model was  
 6 done using the Matlab function `glmfit` (Generalized Linear Model  
 7 Regression Fit) (1). The distribution parameter was set to “binomial”,  
 8 since the total number of edges is distributed as a weighted binomial.

9 *NODE2VEC experimental details:* We used the optimized C++  
 10 implementation (2) for NODE2VEC, which is equivalent to the original  
 11 implementation provided by the authors (3). For all our experiments,  
 12 we use the default settings of walk length of 80, 10 walks per node,  
 13  $p=1$  and  $q=1$ .

14 **A. Detailed relationship between rank and triangle structure.**

15 For the smallest Facebook graph, we were able to compute the  
 16 entire set of eigenvalues. This allows us to determine how large a rank  
 17 is required to recreate the low-degree triangle structure. In Figure 1,  
 18 for varying rank of the embedding, we plot the corresponding triangle  
 19 distribution. In this plot, we choose the embedding given by the eigen-  
 20 decomposition (rather than SVD), since it is guaranteed to converge  
 21 to the correct triangle distribution for an  $n$ -dimensional embedding  
 22 ( $n$  is the number of vertices). The SVD and eigendecomposition are  
 23 mostly identical for large singular/eigenvalues, but tend to be different  
 24 (up to a sign) for negative eigenvalues.

25 We observe that even a 1000 dimensional embedding does not  
 26 capture the  $c$  vs  $\Delta$  plots for low degree. Even the rank 2000 embed-  
 27 ding is off the true values, though it is correct to within an order of  
 28 magnitude. This is strong corroboration of our main theorem, which  
 29 says that near linear rank is needed to match the low-degree triangle  
 30 structure.

31 **2. Full details of proof**

32 We provide all the mathematical details that are omitted from the  
 33 main body. For ease of reading, we simply provide all proof (not just  
 34 omitted proofs), potentially repeating text from the main body.

35 For convenience, we restate the setting. Consider a set of vectors  
 36  $\vec{v}_1, \vec{v}_2, \dots, \vec{v}_n \in \mathbb{R}^d$ , that represent the vertices of a social network.  
 37 We will also use the matrix  $V \in \mathbb{R}^{d \times n}$  for these vectors, where  
 38 each column is one of the  $\vec{v}_i$ s. Abusing notation, we will use  $V$  to

39 represent both the set of vectors as well as the matrix. We will refer  
 40 to the vertices by the index in  $[n]$ .

41 Let  $\mathcal{G}_V$  denote the following distribution of graphs over the vertex  
 42 set  $[n]$ . For each index pair  $i, j$ , independently insert (undirected)  
 43 edge  $(i, j)$  with probability  $\max(0, \min(\vec{v}_i \cdot \vec{v}_j, 1))$ .

44 **A. The basic tools.** We now state some results that will be used in  
 45 the final proof.

**Lemma 2.1.** [Rank lemma (4)] Consider any square matrix  $A \in \mathbb{R}^{n \times n}$ . Then

$$\left| \sum_i A_{i,i} \right|^2 \leq \text{rank}(A) \left( \sum_i \sum_j |A_{i,j}|^2 \right)$$

**Lemma 2.2.** Consider a set of  $s$  vectors  $\vec{w}_1, \vec{w}_2, \dots, \vec{w}_s$  in  $\mathbb{R}^d$ .

$$\sum_{\substack{(i,j) \in [s] \times [s] \\ \vec{w}_i \cdot \vec{w}_j < 0}} |\vec{w}_i \cdot \vec{w}_j| \leq \sum_{\substack{(i,j) \in [s] \times [s] \\ \vec{w}_i \cdot \vec{w}_j > 0}} |\vec{w}_i \cdot \vec{w}_j|$$

*Proof.* Note that  $(\sum_{i \leq s} \vec{w}_i) \cdot (\sum_{i \leq s} \vec{w}_i) \geq 0$ . Expand and rearrange  
 46 to complete the proof.  $\square$  47

Recall that an independent set is a collection of vertices that induce  
 48 no edge. 49

**Lemma 2.3.** Any graph with  $h$  vertices and maximum degree  $b$  has  
 50 an independent set of at least  $h/(b+1)$ . 51

*Proof.* Intuitively, one can incrementally build an independent set, by  
 52 adding one vertex to the set, and removing at most  $b+1$  vertices from  
 53 the graph. This process can be done at least  $h/(b+1)$  times. 54

Formally, we prove by induction on  $h$ . First we show the base case.  
 55 If  $h \leq b+1$ , then the statement is trivially true. (There is always an  
 56 independent set of size 1.) For the induction step, let us construct an  
 57 independent set of the desired size. Pick an arbitrary vertex  $x$  and add  
 58 it to the independent set. Remove  $x$  and all of its neighbors. By the  
 59 induction hypothesis, the remaining graph has an independent set of  
 60 size at least  $(h-b-1)/(b+1) = h/(b+1) - 1$ .  $\square$  61

**Claim 2.4.** Consider the distribution  $\mathcal{G}_V$ . Let  $D_i$  denote the degree  
 62 of vertex  $i \in [n]$ .  $\mathbf{E}[D_i^2] \leq \mathbf{E}[D_i] + \mathbf{E}[D_i]^2$ . 63

*Proof.* (of Claim 2.4) Fix any vertex  $i \in [n]$ . Observe that  $D_i =$   
 64  $\sum_{j \neq i} X_j$ , where  $X_j$  is the indicator random variable for edge  $(i, j)$   
 65 being present. Furthermore, all the  $X_j$ s are independent. 66

$$\begin{aligned} \mathbf{E}[D_i^2] &= \mathbf{E}\left[\left(\sum_{j \neq i} X_j\right)^2\right] = \mathbf{E}\left[\sum_{j \neq i} X_j^2 + 2 \sum_{j \neq j'} X_j X_{j'}\right] & 67 \\ &= \mathbf{E}\left[\sum_{j \neq i} X_j\right] + 2 \sum_{j \neq j'} \mathbf{E}[X_j] \mathbf{E}[X_{j'}] & 68 \\ &\leq \mathbf{E}[D_i] + \left(\sum_{j \neq i} \mathbf{E}[X_j]\right)^2 = \mathbf{E}[D_i] + \mathbf{E}[D_i]^2 & 69 \end{aligned}$$

$\square$  70

A key component of dealing with arbitrary length vectors is the  
 71 following dot product lemma. This is inspired by results of Alon (5)  
 72 and Tao (6), who get a stronger lower bound of  $1/\sqrt{d}$  for absolute  
 73 values of the dot products. 74

**Lemma 2.5.** Consider any set of  $4d$  unit vectors  $\vec{u}_1, \vec{u}_2, \dots, \vec{u}_{4d}$  in  
 75  $\mathbb{R}^d$ . There exists some  $i \neq j$  such that  $\vec{u}_i \cdot \vec{u}_j \geq 1/4d$ . 76

77 *Proof.* (of [Lemma 2.5](#)) We prove by contradiction, so assume  $\forall i \neq$   
78  $j, \vec{u}_i \cdot \vec{u}_j < 1/4d$ . We partition the set  $[4d] \times [4d]$  into  $\mathcal{N} = \{(i, j) \mid \vec{u}_i \cdot$   
79  $\vec{u}_j < 0\}$  and  $\mathcal{P} = \{(i, j) \mid \vec{u}_i \cdot \vec{u}_j \geq 0\}$ . The proof goes by providing  
80 (inconsistent) upper and lower bounds for  $\sum_{(i,j) \in \mathcal{N}} |\vec{u}_i \cdot \vec{u}_j|^2$ . First,  
81 we upper bound  $\sum_{(i,j) \in \mathcal{N}} |\vec{u}_i \cdot \vec{u}_j|^2$  by:

$$\begin{aligned}
82 & \leq \sum_{(i,j) \in \mathcal{N}} |\vec{u}_i \cdot \vec{u}_j| \quad (\vec{u}_i \text{ s are unit vectors}) \\
83 & \leq \sum_{i \leq 4d} \|\vec{u}_i\|_2^2 + \sum_{\substack{1 \leq i \neq j \leq 4d \\ (i,j) \in \mathcal{P}}} |\vec{u}_i \cdot \vec{u}_j| \quad (\text{Lemma 2.2}) \\
84 & < 4d + 16d^2/4d = 8d \quad (\text{by assumption, } \vec{u}_i \cdot \vec{u}_j < 1/4d \text{ [1]})
\end{aligned}$$

85 For the lower bound, we invoke the rank bound of [Lemma 2.1](#) on the  
86  $4d \times 4d$  Gram matrix  $M$  of  $\vec{u}_1, \dots, \vec{u}_{4d}$ . Note that  $\text{rank}(M) \leq d$ ,  
87  $M_{i,i} = 1$ , and  $M_{i,j} = \vec{u}_i \cdot \vec{u}_j$ . By [Lemma 2.1](#),  $\sum_{(i,j) \in [4d] \times [4d]} |\vec{u}_i \cdot$   
88  $\vec{u}_j|^2 \geq (4d)^2/d = 16d$ . We bound

$$\begin{aligned}
89 & \sum_{(i,j) \in \mathcal{P}} |\vec{u}_i \cdot \vec{u}_j|^2 = \sum_{i \leq 4d} \|\vec{u}_i\|_2^2 + \sum_{(i,j) \in \mathcal{P}, i \neq j} |\vec{u}_i \cdot \vec{u}_j|^2 \quad [2] \\
90 & \leq 4d + (4d)^2/(4d)^2 \leq 5d \quad [3]
\end{aligned}$$

91 Thus,  $\sum_{(i,j) \in \mathcal{N}} |\vec{u}_i \cdot \vec{u}_j|^2 \geq 16d - 5d = 11d$ . This contradicts the  
92 bound of [Eqn. \(1\)](#).  
93  $\square$

94 **B. The main argument.** We prove by contradiction. We assume  
95 that the expected number of triangles contained in the set of vertices  
96 of expected degree at most  $c$ , is at least  $\Delta n$ . We remind the reader  
97 that  $n$  is the total number of vertices. For convenience, we simply  
98 remove the vectors corresponding to vertices with expected degree at  
99 least  $c$ . Let  $\hat{V}$  be the matrix of the remaining vectors, and we focus  
100 on  $\mathcal{G}_{\hat{V}}$ . The expected number of triangles in  $G \sim \mathcal{G}_{\hat{V}}$  is at least  $\Delta n$ .

The overall proof can be thought of in three parts.

102 *Part 1, remove extremely long vectors:* Our final aim is to use the  
103 rank lemma ([Lemma 2.1](#)) to lower bound the rank of  $V$ . The first  
104 problem we encounter is that extremely long vectors can dominate the  
105 expressions in the rank lemma, and we do not get useful bounds. We  
106 show that the number of such long vectors is extremely small, and they  
107 can be removed without affecting too many triangles. In addition, we can  
108 also remove extremely small vectors, since they cannot participate in  
109 many triangles.

110 *Part 2, find a "core" of sufficiently long vectors that contains*  
111 *enough triangles:* The previous step gets a "cleaned" set of vectors.  
112 Now, we bucket these vectors by length. We show that there is a  
113 large bucket, with vectors that are sufficiently long, such that there  
114 are enough triangle contained in this bucket.

115 *Part 3, apply the rank lemma to the "core":* We now focus on this  
116 core of vectors, where the rank lemma can be applied.

117 Now for the formal proof. For the sake of contradiction, we assume  
118 that  $d = \text{rank}(\hat{V}) < \alpha(\Delta^4/c^9) \cdot n / \lg^2 n$  (for some sufficiently small  
119 constant  $\alpha > 0$ ).

120 **Part 1: Removing extremely long (and extremely short) vec-**  
121 **tors**

122 We begin by showing that there cannot be many long vectors in  $\hat{V}$ .

123 **Lemma 2.6.** *There are at most  $5cd$  vectors of length at least  $2\sqrt{n}$ .*

124 *Proof.* Let  $\mathcal{L}$  be the set of "long" vectors, those with length at least  
125  $2\sqrt{n}$ . Let us prove by contradiction, so assume there are more than  
126  $5cd$  long vectors. Consider a graph  $H = (\mathcal{L}, E)$ , where vectors

127  $\vec{v}_i, \vec{v}_j \in \mathcal{L}$  ( $i \neq j$ ) are connected by an edge if  $\frac{\vec{v}_i}{\|\vec{v}_i\|_2} \cdot \frac{\vec{v}_j}{\|\vec{v}_j\|_2} \geq 1/4n$ .  
128 We choose the  $1/4n$  bound to ensure that all edges in  $H$  are edges in  
129  $G$ .

130 Formally, for any edge  $(i, j)$  in  $H$ ,  $\vec{v}_i \cdot \vec{v}_j \geq \|\vec{v}_i\|_2 \|\vec{v}_j\|_2 / 4n \geq$   
131  $(2\sqrt{n})^2 / 4n = 1$ . So  $(i, j)$  is an edge with probability 1 in  $G \sim \mathcal{G}_V$ .  
132 The degree of any vertex in  $H$  is at most  $c$ . By [Lemma 2.3](#),  $H$  contains  
133 an independent set  $I$  of size at least  $5cd/(c+1) \geq 4d$ . Consider  
134 an arbitrary sequence of  $4d$  (normalized) vectors in  $I$   $\vec{u}_1, \dots, \vec{u}_{4d}$ .  
135 Applying [Lemma 2.5](#) to this sequence, we deduce the existence of  
136  $(i, j)$  in  $I$  ( $i \neq j$ ) such that  $\frac{\vec{v}_i}{\|\vec{v}_i\|_2} \cdot \frac{\vec{v}_j}{\|\vec{v}_j\|_2} \geq 1/4d \geq 1/4n$ . Then, the  
137 edge  $(i, j)$  should be present in  $H$ , contradicting the fact that  $I$  is an  
138 independent set.  $\square$

139 Denote by  $V'$  the set of all vectors in  $\hat{V}$  with length in the range  
140  $[n^{-2}, 2\sqrt{n}]$ .

141 **Claim 2.7.** *The expected degree of every vertex in  $G \sim \mathcal{G}_{V'}$  is at*  
142 *most  $c$ , and the expected number of triangles in  $G$  is at least  $\Delta n/2$ .*

143 *Proof.* Since removal of vectors can only decrease the degree, the  
144 expected degree of every vertex in  $\mathcal{G}_{V'}$  is naturally at most  $c$ . It  
145 remains to bound the expected number of triangles in  $G \sim \mathcal{G}_{V'}$ . By  
146 removing vectors in  $V \setminus V'$ , we potentially lose some triangles. Let  
147 us categorize them into those that involve at least one "long" vector  
148 (length  $\geq 2\sqrt{n}$ ) and those that involve at least one "short" vector  
149 (length  $\leq n^{-2}$ ) but no long vector.

150 We start with the first type. By [Lemma 2.6](#), there are at most  
151  $5cd$  long vectors. For any vertex, the expected number of triangles  
152 incident to that vertex is at most the expected square of the degree.  
153 By [Claim 2.4](#), the expected degree squares is at most  $c + c^2 \leq 2c^2$ .  
154 Thus, the expected total number of triangles of the first type is at most  
155  $5cd \times 2c^2 \leq \Delta n / \lg^2 n$ .

156 Consider any triple of vectors  $(\vec{u}, \vec{v}, \vec{w})$  where  $\vec{u}$  is short and nei-  
157 ther of the others are long. The probability that this triple forms a  
158 triangle is at most

$$\begin{aligned}
\min(\vec{u} \cdot \vec{v}, 1) \cdot \min(\vec{u} \cdot \vec{w}, 1) & \leq \min(\|\vec{u}\|_2 \|\vec{v}\|_2, 1) \cdot \min(\|\vec{u}\|_2 \|\vec{w}\|_2, 1) \\
& \leq (n^{-2} \cdot 2\sqrt{n})^2 \leq 4n^{-3}
\end{aligned}$$

161 Summing over all such triples, the expected number of such triangles  
162 is at most 4.

163 Thus, the expected number of triangles in  $G \sim \mathcal{G}_{V'}$  is at least  
164  $\Delta n - \Delta n / \lg^2 n - 4 \geq \Delta n/2$ .  $\square$

165 **Part 2: Finding core of sufficiently long vectors with enough**  
166 **triangles**

167 For any integer  $r$ , let  $V_r$  be the set of vectors  $\{\vec{v} \in V' \mid \|\vec{v}\|_2 \in$   
168  $[2^r, 2^{r+1}]\}$ . Observe that the  $V_r$ s form a partition of  $V'$ . Since all  
169 lengths in  $V'$  are in the range  $[n^{-2}, 2\sqrt{n}]$ , there are at most  $3 \lg n$   
170 non-empty  $V_r$ s. Let  $R$  be the set of indices  $r$  such that  $|V_r| \geq$   
171  $(\Delta/60c^2)(n/\lg n)$ . Furthermore, let  $V''$  be  $\bigcup_{r \in R} V_r$ .

172 **Claim 2.8.** *The expected number of triangles in  $G \sim \mathcal{G}_{V''}$  is at least*  
173  *$\Delta n/8$ .*

174 *Proof.* The total number of vectors in  $\bigcup_{r \notin R} V_r$  is at most  $3 \lg n \times$   
175  $(\Delta/60c^2)(n/\lg n) \leq (\Delta/20c^2)n$ . By [Claim 2.4](#) and linearity of  
176 expectation, the expected sum of squares of degrees of all vectors  
177 in  $\bigcup_{r \notin R} V_r$  is at most  $(d + c^2) \times (\Delta/20c^2)n \leq \Delta n/10$ . Since the  
178 expected number of triangles in  $G \sim \mathcal{G}_{V'}$  is at least  $\Delta n/2$  ([Claim 2.7](#))  
179 and the expected number of triangles incident to vectors in  $V' \setminus V''$   
180 is at most  $\Delta n/10$ , the expected number of triangles in  $G \sim \mathcal{G}_{V''}$  is  
181 at least  $\Delta n/2 - \Delta n/10 \geq \Delta n/8$ .  $\square$

182 We now come to an important claim. Because the expected number  
183 of triangles in  $G \sim \mathcal{G}_{V''}$  is large, we can prove that  $V''$  must contain  
184 vectors of at least constant length.

185 **Claim 2.9.**  $\max_{r \in R} 2^r \geq \sqrt{\Delta}/4c$ .

*Proof.* Suppose not. Then every vector in  $V''$  has length at most  
 $\sqrt{\Delta}/4c$ . By Cauchy-Schwartz, for every pair  $\vec{u}, \vec{v} \in V''$ ,  $\vec{u} \cdot \vec{v} \leq$   
 $\Delta/16c^2$ . Let  $I$  denote the set of vector indices in  $V''$  (this corresponds  
to the vertices in  $G \sim \mathcal{G}_{V''}$ ). For any two vertices  $i \neq j \in I$ , let  $X_{i,j}$   
be the indicator random variable for edge  $(i, j)$  being present. The  
expected number of triangles incident to vertex  $i$  in  $G \sim \mathcal{G}_{V''}$  is

$$\mathbf{E}\left[\sum_{j \neq k \in I} X_{i,j} X_{i,k} X_{j,k}\right] = \sum_{j \neq k \in I} \mathbf{E}[X_{i,j} X_{i,k}] \mathbf{E}[X_{j,k}]$$

186 Observe that  $\mathbf{E}[X_{j,k}]$  is at most  $\vec{v}_j \cdot \vec{v}_k \leq \Delta/16c^2$ . Furthermore,  
187  $\sum_{j \neq k \in I} \mathbf{E}[X_{i,j} X_{i,k}] = \mathbf{E}[D_i^2]$  (recall that  $D_i$  is the degree of vertex  
188  $i$ .) By [Claim 2.4](#), this is at most  $c + c^2 \leq 2c^2$ . The expected number  
189 of triangles in  $G \sim \mathcal{G}_{V''}$  is at most  $n \times 2c^2 \times \Delta/16c^2 = \Delta n/8$ .  
190 This contradicts [Claim 2.8](#).  $\square$

### 191 Part 3: Applying the rank lemma to the core

192 We are ready to apply the rank bound of [Lemma 2.1](#) to prove the  
193 final result. The following lemma contradicts our initial bound on  
194 the rank  $d$ , completing the proof. We will omit some details in the  
195 following proof, and provide a full proof in the SI.

196 **Lemma 2.10.**  $\text{rank}(V'') \geq (\alpha \Delta^4 / c^9) n / \lg^2 n$ .

197 *Proof.* It is convenient to denote the index set of  $V''$  be  $I$ .  
198 Let  $M$  be the Gram Matrix  $(V'')^T (V'')$ , so for  $i, j \in I$ ,  
199  $M_{i,j} = \vec{v}_i \cdot \vec{v}_j$ . By [Lemma 2.1](#),  $\text{rank}(V'') = \text{rank}(M) \geq$   
200  $(\sum_{i \in I} M_{i,i})^2 / \sum_{i,j \in I} |M_{i,j}|^2$ . Note that  $M_{i,i}$  is  $\|\vec{v}_i\|_2^2$ , which is  
201 at least  $2^{2r}$  for  $\vec{v}_i \in V_r$ . Let us denote  $\max_{r \in R} 2^r$  by  $L$ , so all vec-  
202 tors in  $V''$  have length at most  $2L$ . By Cauchy-Schwartz, all entries  
203 in  $M$  are at most  $4L^2$ .

204 We lower bound the numerator.

$$\begin{aligned} 205 & \left(\sum_{i \in I} \|\vec{v}_i\|_2^2\right)^2 \geq \left(\sum_{r \in R} 2^{2r} |V_r|\right)^2 \\ 206 & \geq \left(\max_{r \in R} 2^{2r} (\Delta/60c^2)(n/\lg n)\right)^2 = L^4 (\Delta^2/3600c^4)(n^2/\lg^2 n) \end{aligned}$$

207 Now for the denominator. We split the sum into four parts and  
208 bound each separately.

$$\begin{aligned} 209 & \sum_{i,j \in I} |M_{i,j}|^2 = \sum_{i \in I} |M_{i,i}|^2 + \sum_{\substack{i,j \in I \\ i \neq j, M_{i,j} \in [0,1]}} |M_{i,j}|^2 \\ 210 & + \sum_{\substack{i,j \in I \\ i \neq j, M_{i,j} > 1}} |M_{i,j}|^2 + \sum_{\substack{i,j \in I \\ M_{i,j} < 0}} |M_{i,j}|^2 \quad [4] \end{aligned}$$

211 Since  $|M_{i,i}| \leq L^2$ , the first term is at most  $4nL^4$ . For  $i \neq j$  and  
212  $M_{i,j} \in [0, 1]$ , the probability that edge  $(i, j)$  is present is precisely  
213  $M_{i,j}$ . Thus, for the second term,

$$214 \sum_{\substack{i,j \in I \\ i \neq j, M_{i,j} \in [0,1]}} |M_{i,j}|^2 \leq \sum_{\substack{i,j \in I \\ i \neq j, M_{i,j} \in [0,1]}} M_{i,j} \leq 2cn \quad [5]$$

215 For the third term, we observe that when  $M_{i,j} > 1$  (for  $i \neq j$ ), then  
216  $(i, j)$  is an edge with probability 1. There can be at most  $2cn$  pairs  
217  $(i, j)$ ,  $i \neq j$ , such that  $M_{i,j} > 1$ . Thus, the third term is at most  
218  $2cn \cdot (4L^2)^2 = 32cnL^4$ .

219 Now for the fourth term. Note that  $M$  is a Gram matrix, so we can  
220 invoke [Lemma 2.2](#) on its entries.

$$\begin{aligned} 221 & \sum_{\substack{i,j \in I \\ M_{i,j} < 0}} |M_{i,j}|^2 \leq L^2 \sum_{\substack{i,j \in I \\ M_{i,j} < 0}} |M_{i,j}| \\ 222 & \leq L^2 \left( \sum_{i \in I} |M_{i,i}| + \sum_{\substack{i,j \in I \\ M_{i,j} > 0}} |M_{i,j}| \right) \\ 223 & \leq 4nL^4 + L^2 \sum_{\substack{i,j \in I \\ M_{i,j} \in [0,1]}} |M_{i,j}| + 4L^4 \sum_{\substack{i,j \in I \\ M_{i,j} > 1}} 1 \\ 224 & \leq 4nL^4 + 2cnL^2 + 8cnL^4 \quad [6] \end{aligned}$$

225 Putting all the bounds together, we get that  $\sum_{i,j \in I} |M_{i,j}|^2 \leq$   
226  $n(4L^4 + 2c + 32cL^4 + 4L^4 + 2cL^2 + 8cL^4) \leq 32n(L^4 + c(1 +$   
227  $L^2 + L^4))$ . If  $L \leq 1$ , we can upper bound by  $128cn$ . If  $L \geq 1$ , we  
228 can upper bound by  $128cnL^4$ . In either case,  $128cn(1 + L^4)$  is a  
229 valid upper bound.

230 Crucially, by [Claim 2.9](#),  $L \geq \sqrt{\Delta}/4c$ . Thus,  $4^4 c^4 L^4 / \Delta^2 \geq 1$ .  
231 Combining all the bounds (and setting  $\alpha < 1/(128 \cdot 3600 \cdot 4^4)$ ),

$$\begin{aligned} 232 & \text{rank}(V'') \geq \frac{L^4 (\Delta^2/3600c^4)(n^2/\lg^2 n)}{128cn(1 + 16L^4)} \\ 233 & \geq \frac{L^4 (\Delta^2/3600c^4)(n/\lg^2 n)}{128cn(4^4 c^4 L^4 / \Delta^2 + 16L^4)} \geq (\alpha \Delta^4 / c^9)(n/\lg^2 n) \quad \square \end{aligned}$$

- 235 1. (2018) Matlab glmfit function (<https://www.mathworks.com/help/stats/glmfit.html>).
- 236 2. (2018) Node2vec c++ code (<https://github.com/snap-stanford/snap/tree/master/examples/node2vec>).
- 237 3. (2018) Node2vec code (<https://github.com/eliorc/node2vec>).
- 238 4. (2018) The rank lemma (<https://konradswanepoel.wordpress.com/2014/03/04/the-rank-lemma/>).
- 239 5. Alon N (2003) Problems and results in extremal combinatorics, part i, discrete math. *Discrete Math* 273:31–53.
- 240 6. Tao T (2013) A cheap version of the kabatjanskii-levenstein bound  
241 for almost orthogonal vectors (<https://terrytao.wordpress.com/2013/07/18/a-cheap-version-of-the-kabatjanskii-levenstein-bound-for-almost-orthogonal-vectors/>).
- 242
- 243
- 244
- 245
